# Supplementary material for: Semaphorin-3C signals through Neuropilin-1 and PlexinD1 receptors to inhibit pathological angiogenesis
Source: PubMed Central journal article supplement (PMC4604683; doi:10.15252/emmm.201404922), 2015-07-20

**Semaphorin-3C signals through Neuropilin-1 and PlexinD1 receptors to inhibit  
pathological angiogenesis**

Wan-Jen Yang<sup>1,2,6</sup>, Junhao Hu<sup>3,6</sup>, Akiyoshi Uemura<sup>4</sup>, Fabian Tetzlaff<sup>1</sup>, Hellmut G. Augustin<sup>2,3</sup>  
and Andreas Fischer<sup>1,2,5,\*</sup>

## **Supplemental Data**

Figures S1 – S7

**A**

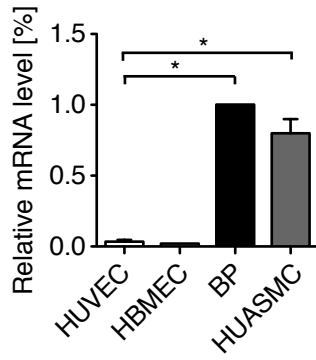

**B**

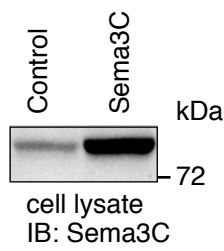

**C**

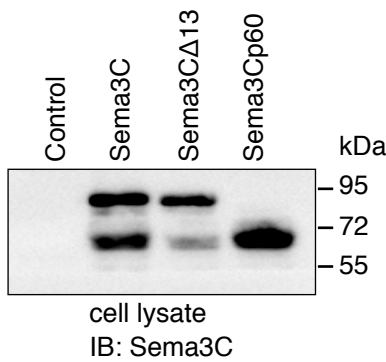

**D**

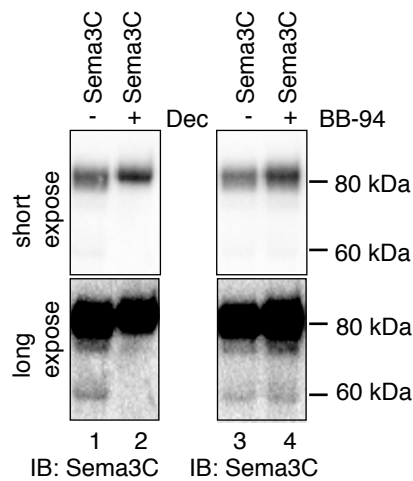

**E**

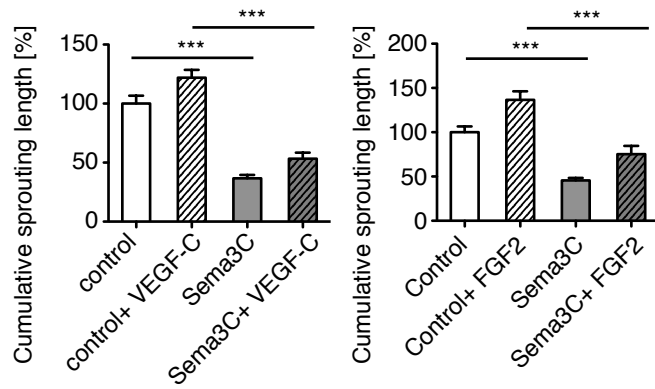

**F**

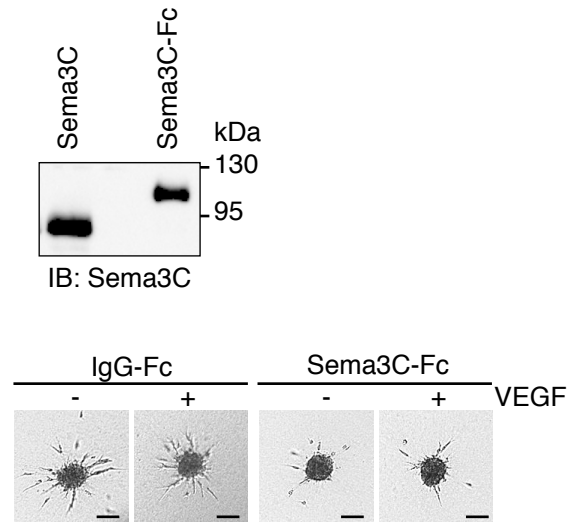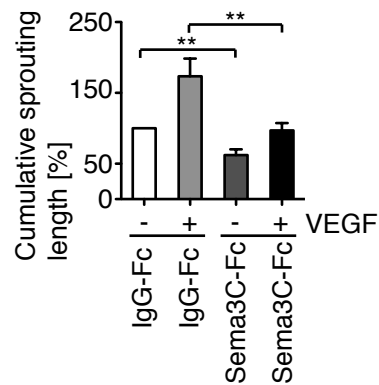

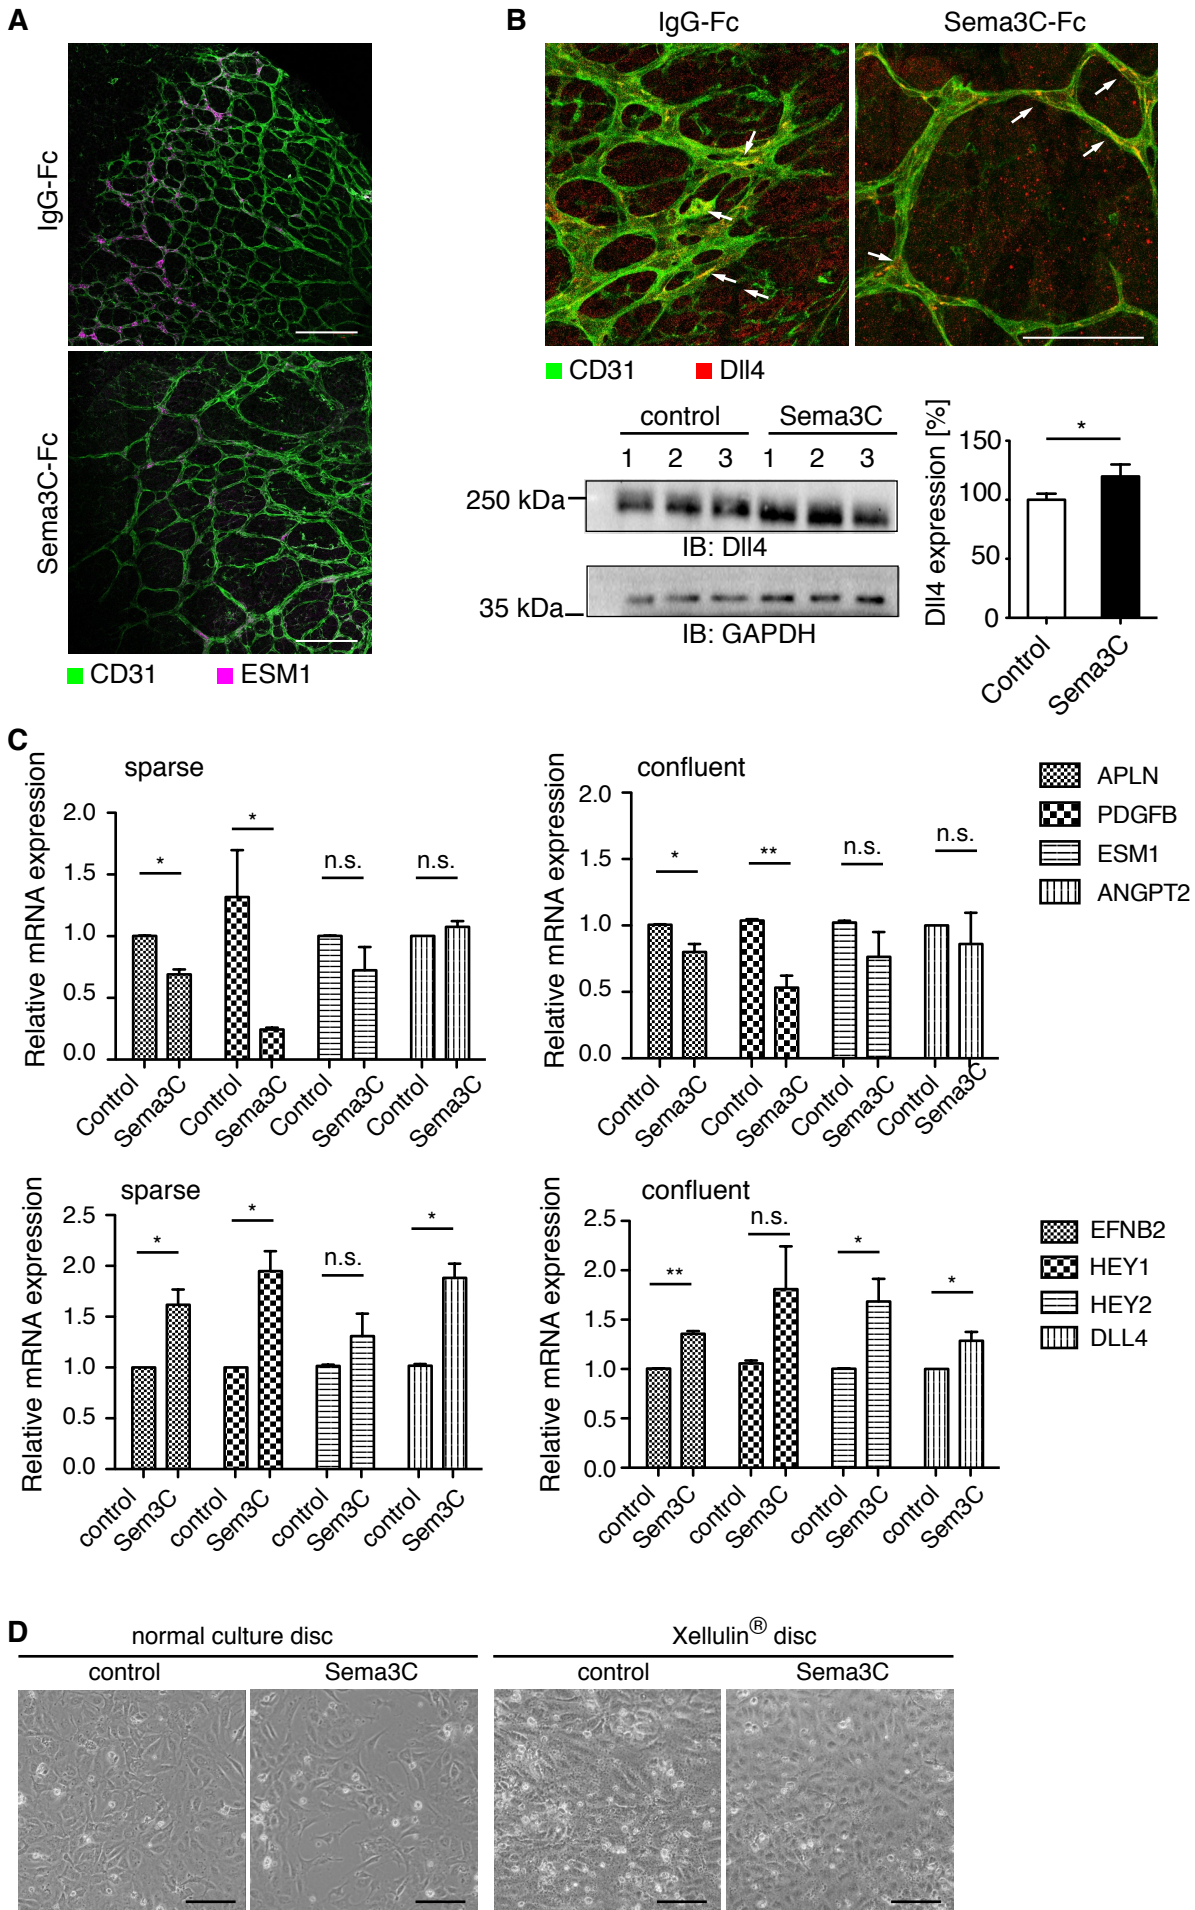

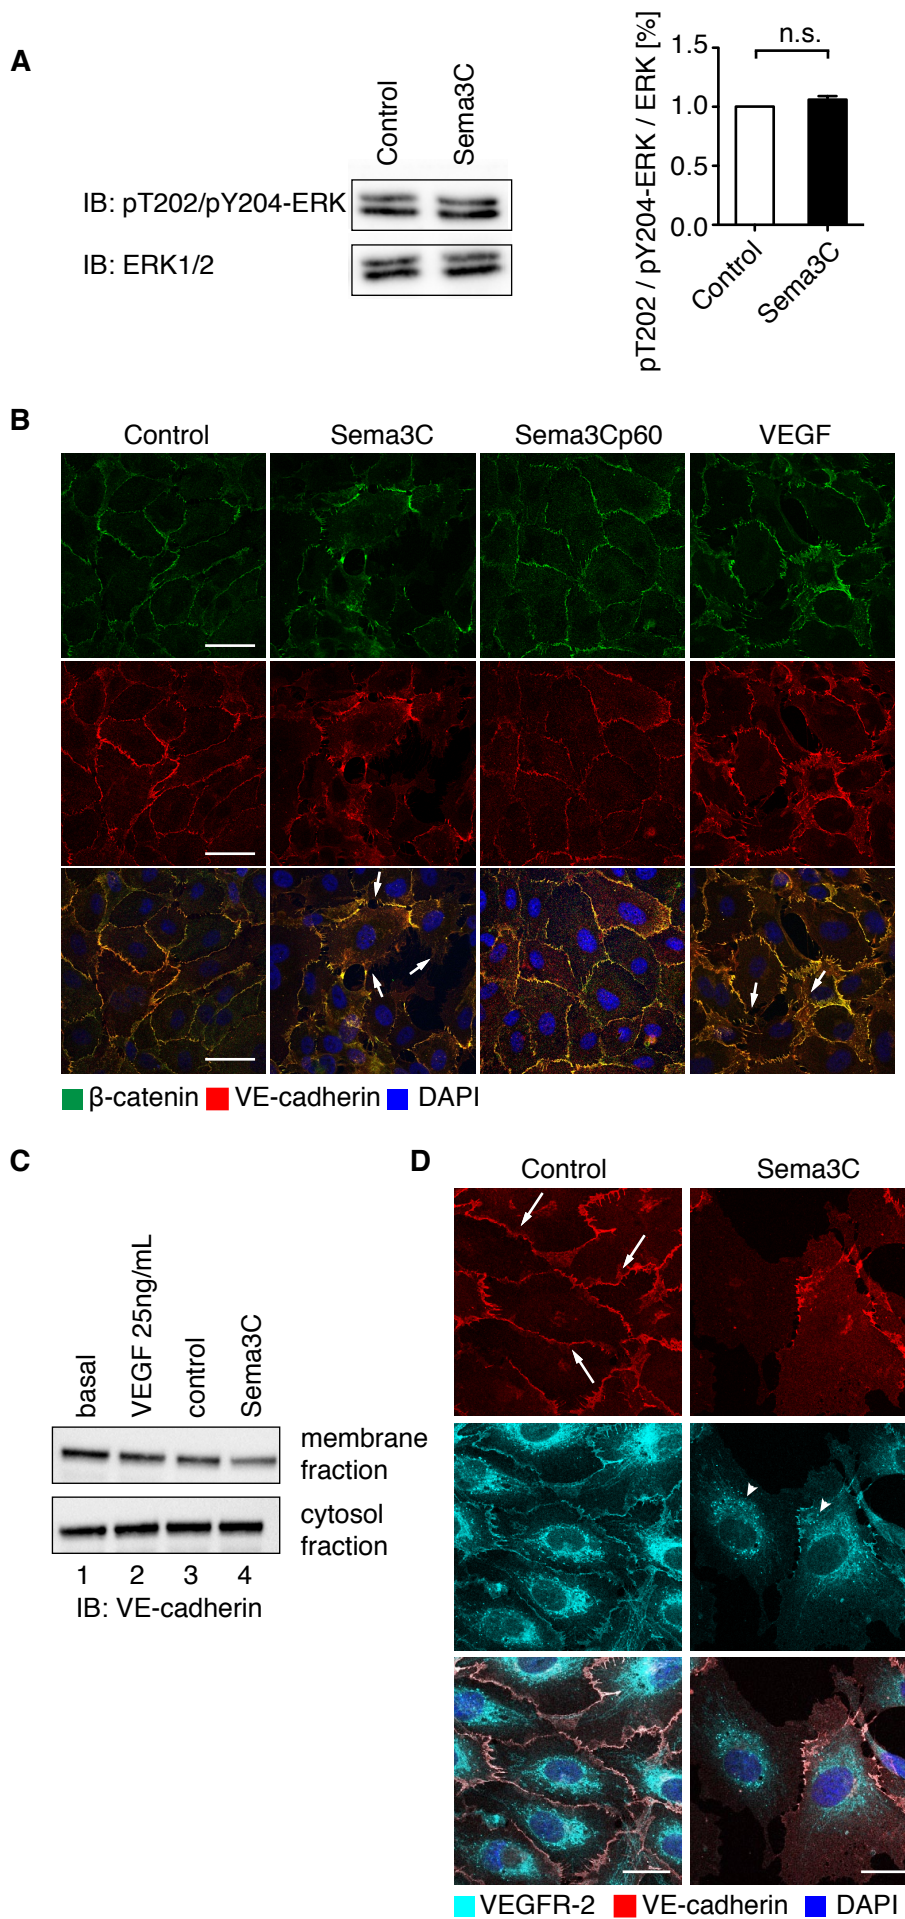



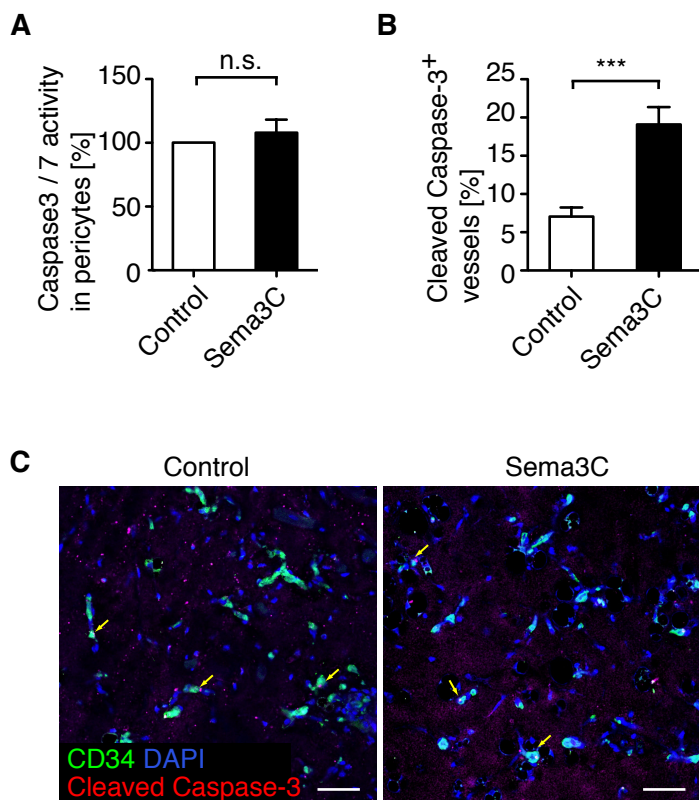

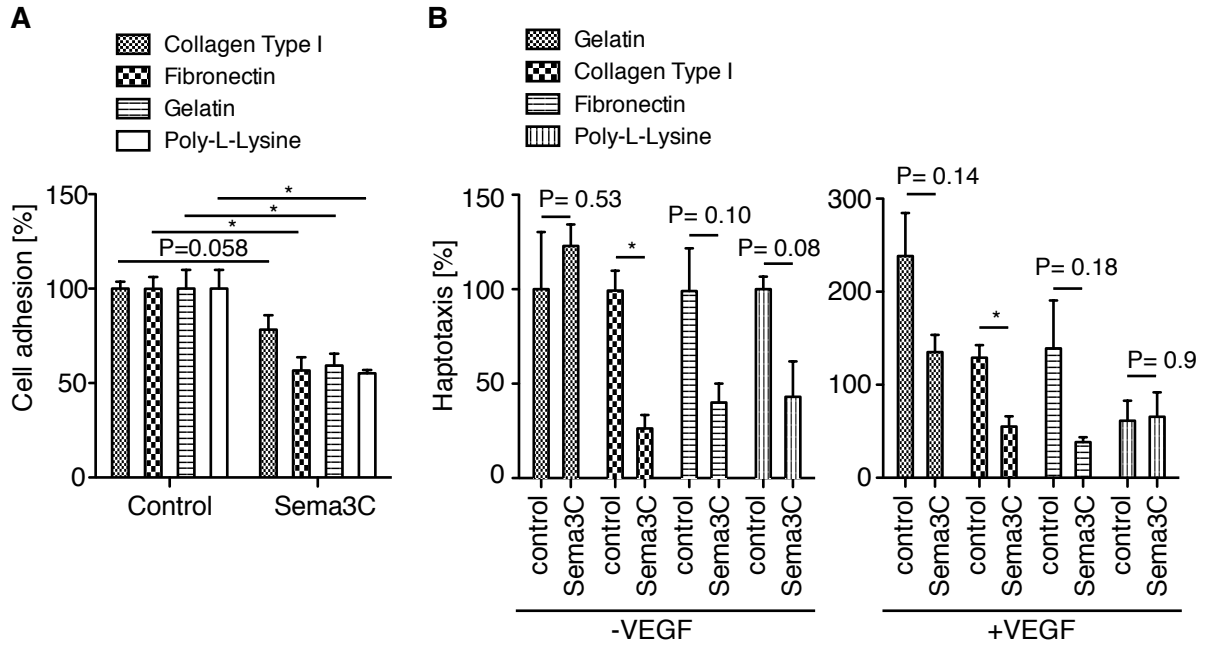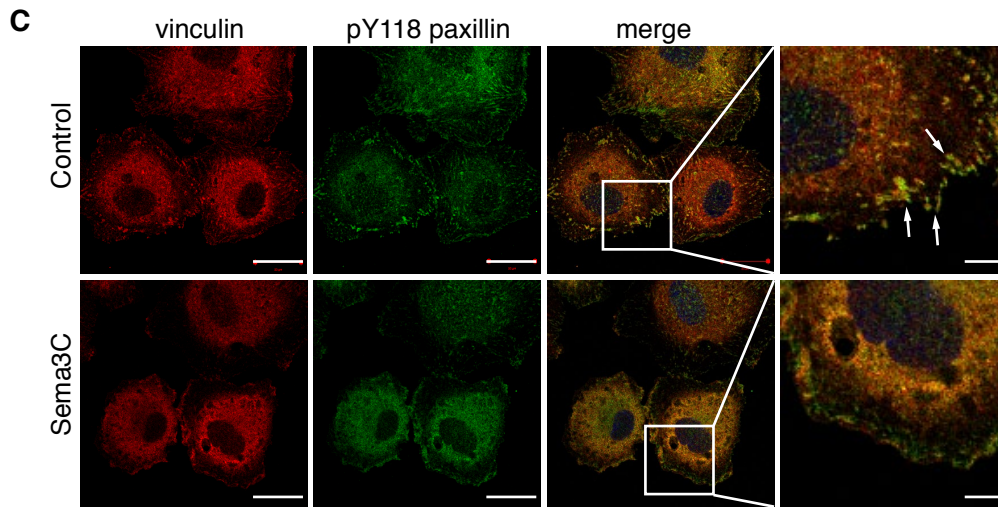

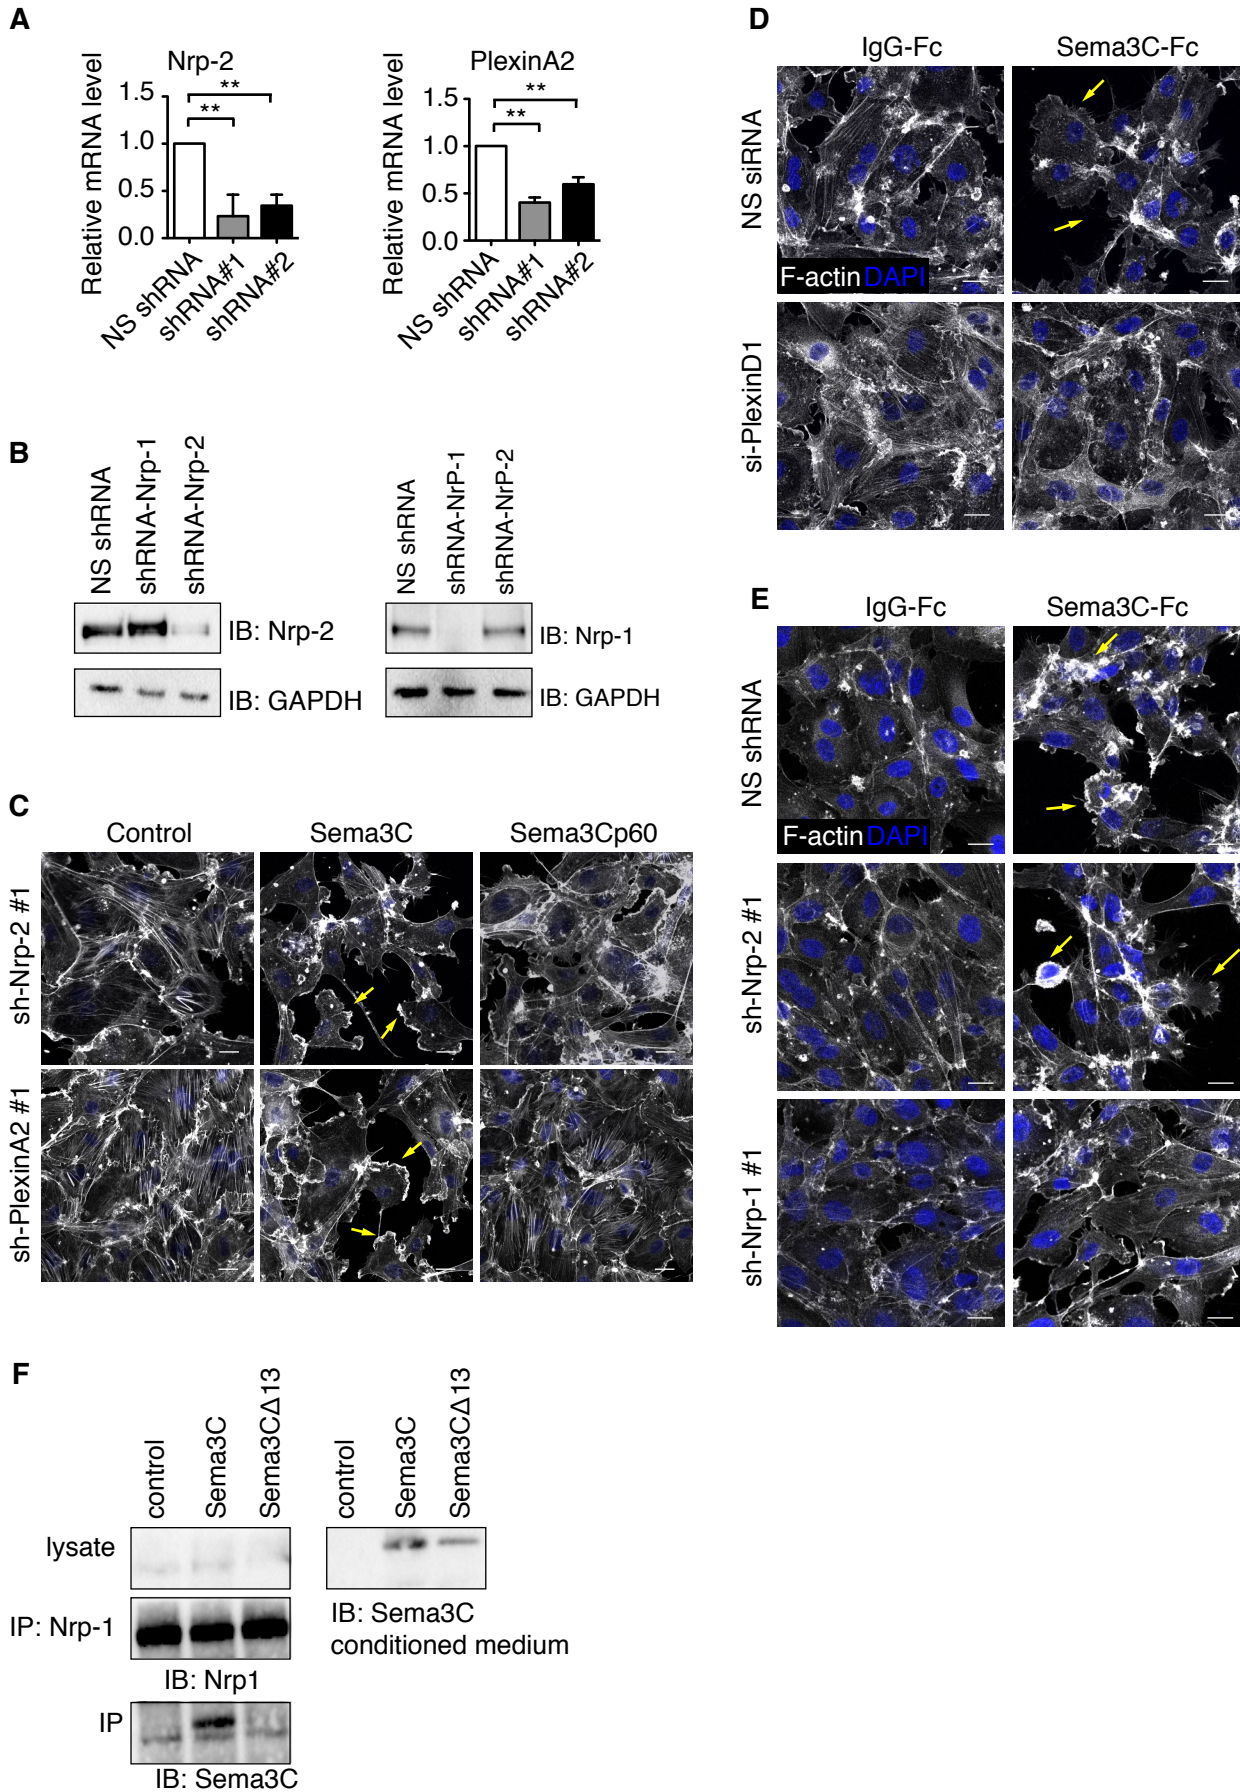



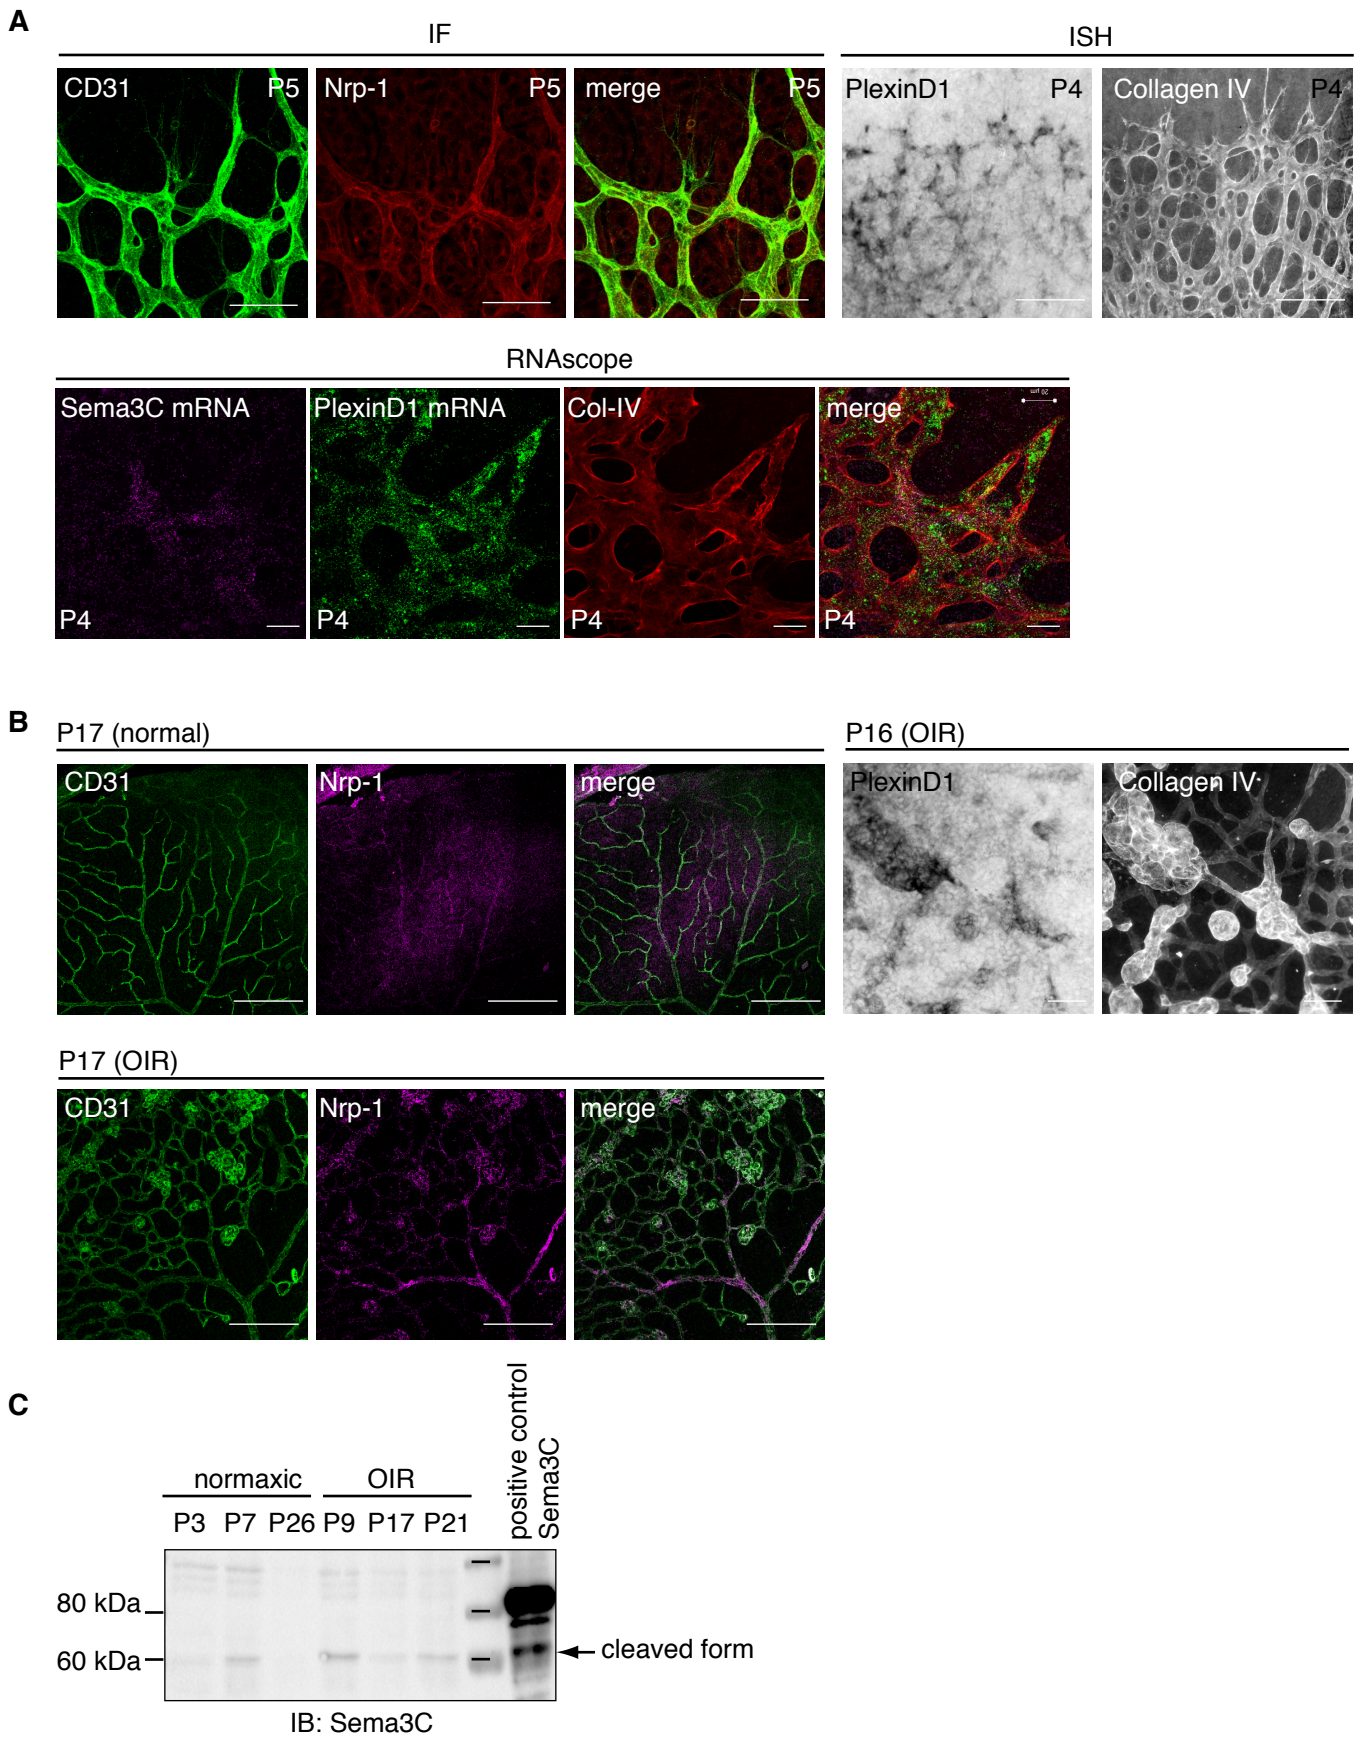

Supplement: emmm0007-1267-sd1.pdf [file emmm0007-1267-sd1.pdf]
