# Supplementary material for: Semaphorin-3C signals through Neuropilin-1 and PlexinD1 receptors to inhibit pathological angiogenesis
Source: PubMed Central journal article supplement (PMC4604683; doi:10.15252/emmm.201404922), 2015-07-20

Source Data for Fig. 4C

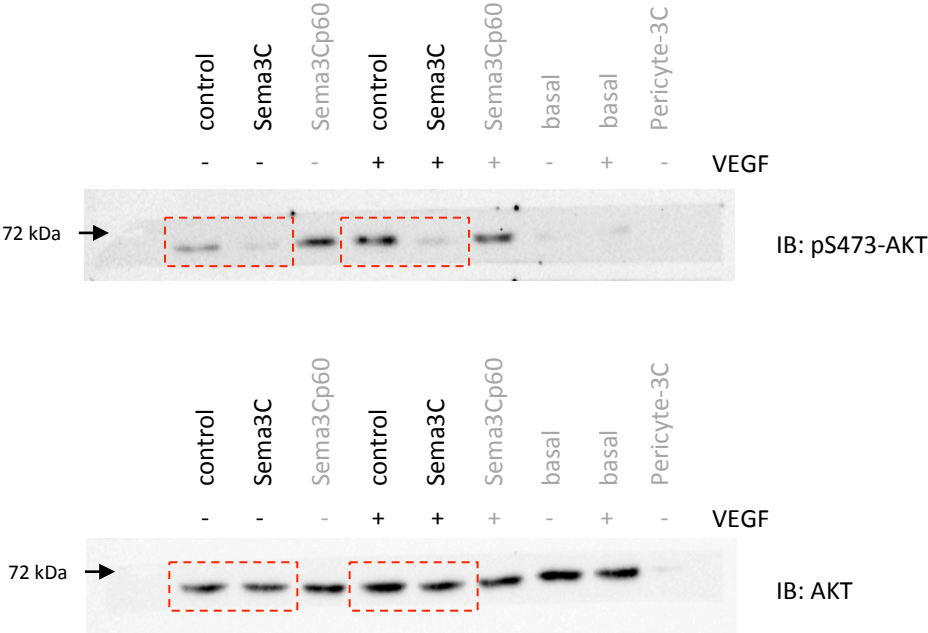

Supplement: emmm0007-1267-sd8.pdf [file emmm0007-1267-sd8.pdf]
