# Supplementary material for: Semaphorin-3C signals through Neuropilin-1 and PlexinD1 receptors to inhibit pathological angiogenesis
Source: PubMed Central journal article supplement (PMC4604683; doi:10.15252/emmm.201404922), 2015-07-20
Supplement: emmm0007-1267-sd9.pdf [file emmm0007-1267-sd9.pdf]

# Source Data for Fig. 5D and 5E

## Fig. 5D

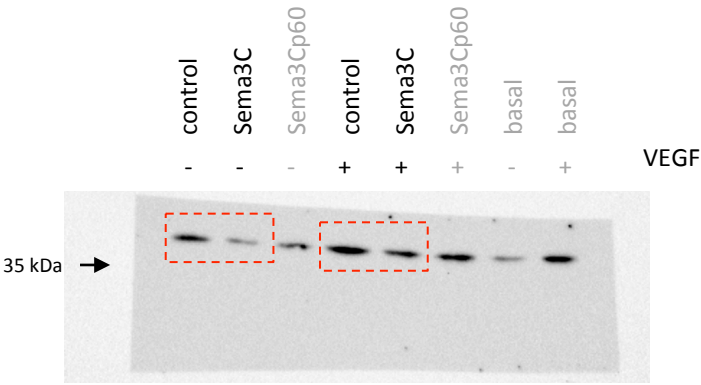

IB: pT180/pY182-p38 MAPK

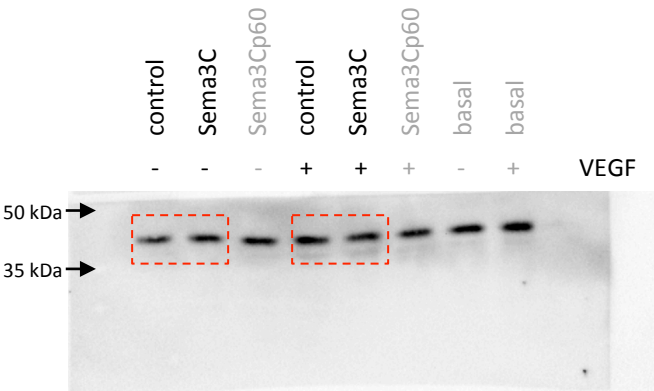

IB: p38 MAPK

## Fig. 5E

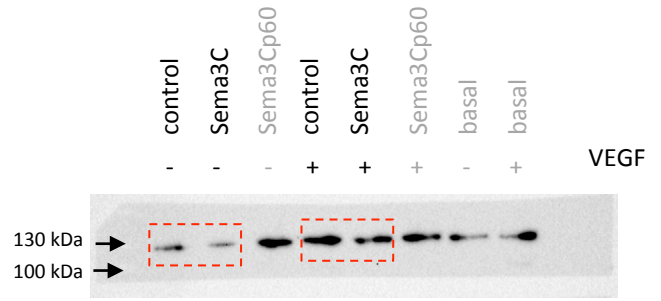

IB: pY397-FAK

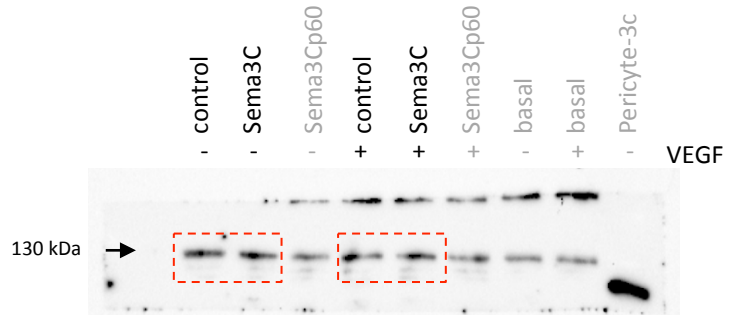

IB: FAK
