# Supplementary material for: Semaphorin-3C signals through Neuropilin-1 and PlexinD1 receptors to inhibit pathological angiogenesis
Source: PubMed Central journal article supplement (PMC4604683; doi:10.15252/emmm.201404922), 2015-07-20

# Source Data for Fig. 6A, 6C and 6E

## Fig. 6A

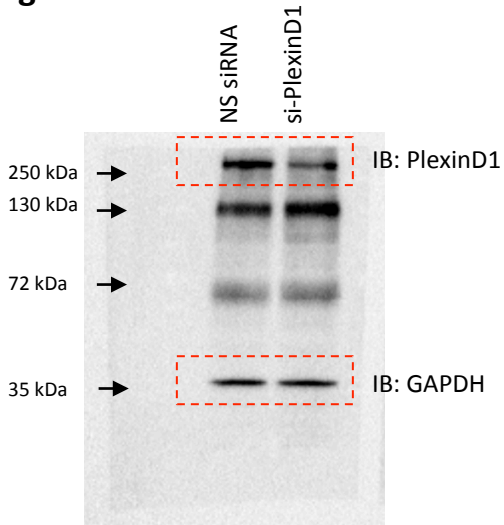

## Fig. 6C

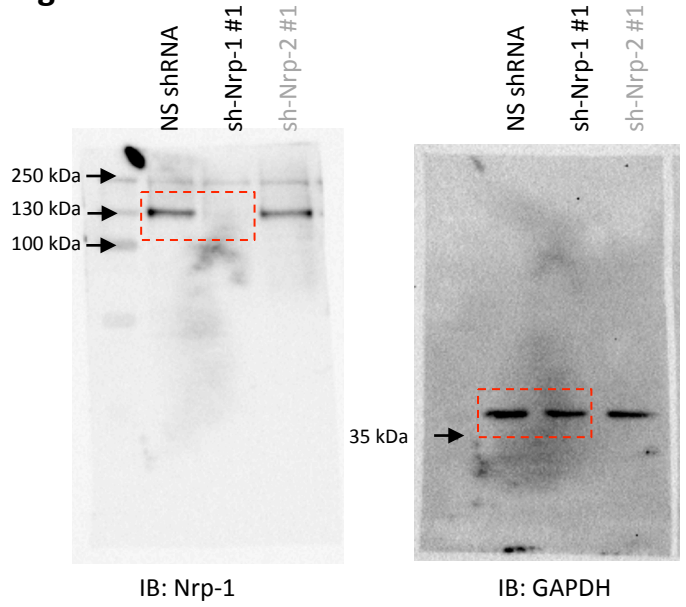

## Fig. 6E

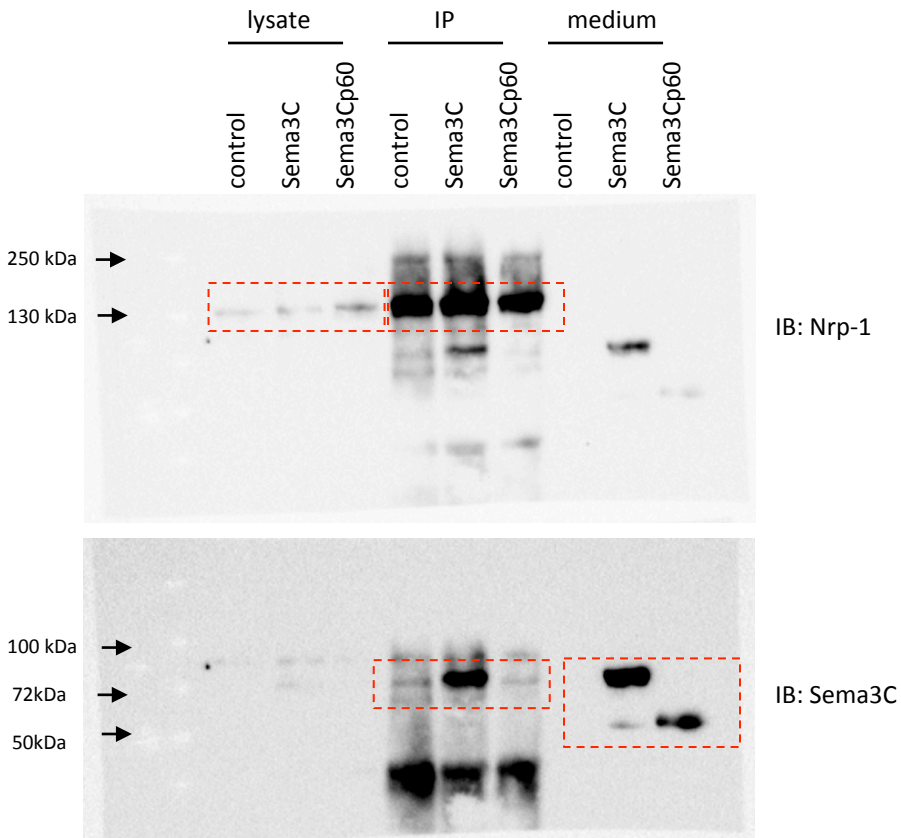

Supplement: emmm0007-1267-sd10.pdf [file emmm0007-1267-sd10.pdf]
